# Supplementary material for: Insulin-Like Peptides Regulate Feeding Preference and Metabolism in Drosophila
Source: PubMed Central journal article supplement (PMC6118219; doi:10.3389/fphys.2018.01083), 2018-08-24
Supplement: Table_1.pdf [file Table_1.pdf]

## SUPPLEMENTAL DATA

Semaniuk UV, Gospodaryov DV, Feden'ko KM, Yurkevych IS, Vaiserman AM, Storey KB, Simpson SJ and Lushchak O (2018) Insulin-like peptides regulate feeding preference and metabolism in *Drosophila*. *Front. Physiol.* 9:1083. doi: 10.3389/fphys.2018.01083

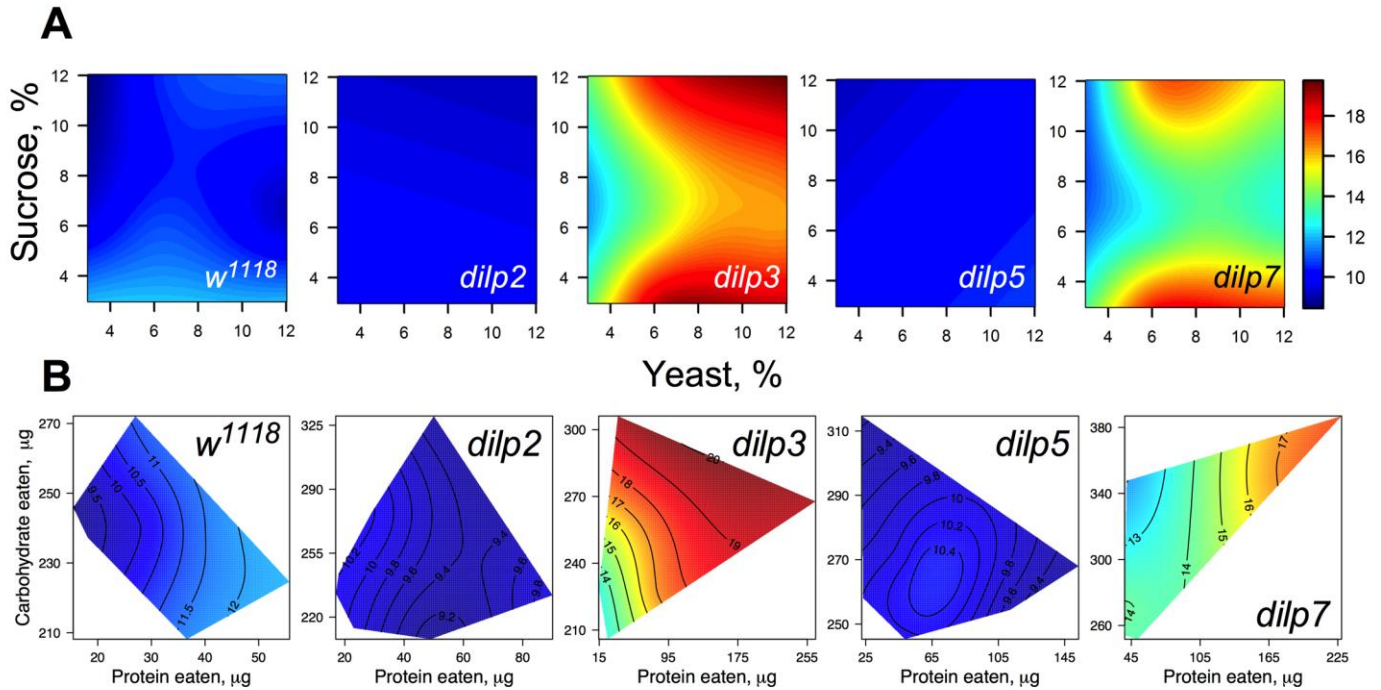

**Figure S1.** Diet-dependent patterns of body glucose in the wild type and *dilp* mutant flies. (A) Dietary response surfaces depicting dependence of glucose content in the body of individuals of the the wild type (*w<sup>1118</sup>*) and *dilp* mutant lines on concentrations of yeast and sucrose in the diet. (B) Dietary response surfaces showing dependence of body glucose content in the the wild type and *dilp* mutant lines on amounts of protein and carbohydrate consumed. Each surface has own scale shown by contour lines. Data are n = 3-6 replicates for each diet and fly line combination.

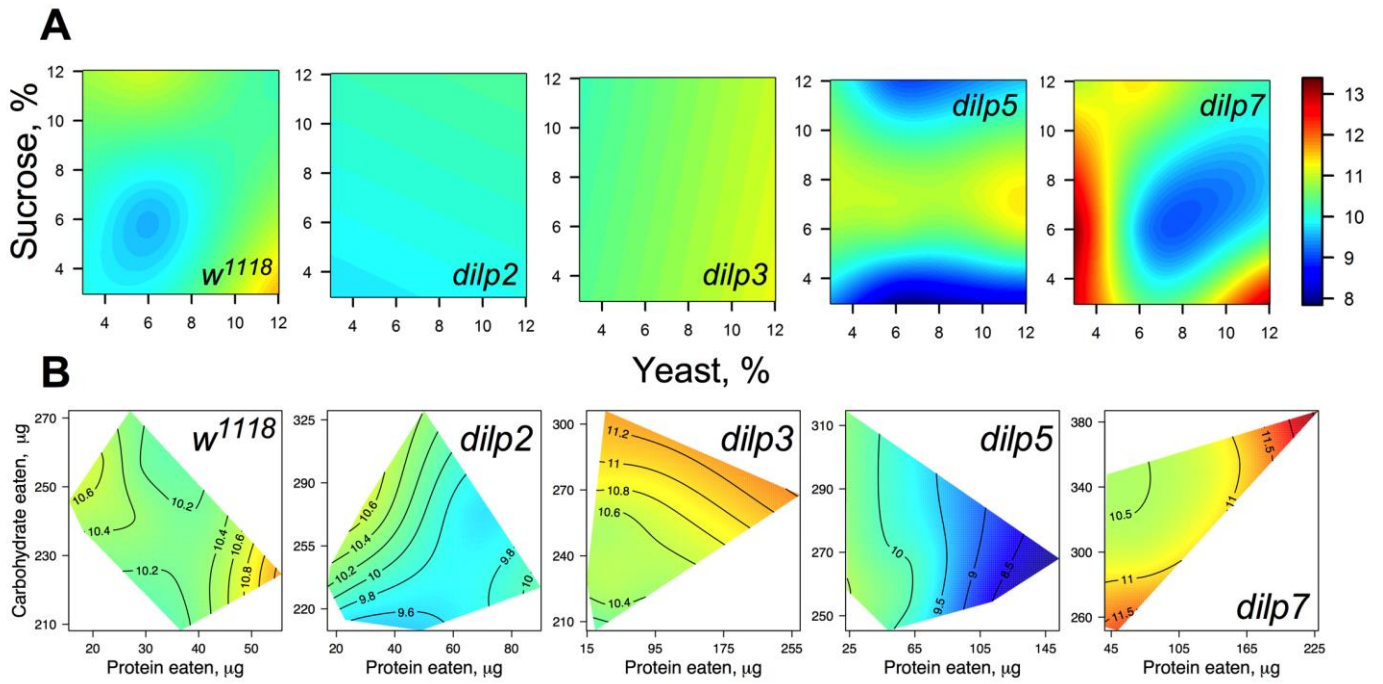

**Figure S2.** Diet-dependent patterns of body trehalose in the wild type and *dilp* mutant flies. (A) Dietary response surfaces depicting dependence of trehalose content in the body of individuals of the wild type (*w<sup>1118</sup>*) and *dilp* mutant lines on concentrations of yeast and sucrose in the diet. (B) Dietary response surfaces showing dependence of body trehalose content in the wild type and *dilp* mutant lines on amounts of protein and carbohydrate consumed. Each surface has own scale shown by contour lines. Data are  $n = 3-6$  replicates for each diet and fly line combination.

**Table S1.** Genotypes and stock numbers of fruit fly mutant lines used in this study.

| Name                  | Genotype                            | Genetic background | Bloomington stock number | Cytogenetic location of the mutation |
|-----------------------|-------------------------------------|--------------------|--------------------------|--------------------------------------|
| <i>dilp1</i> mutant   | $w^*$ ; <i>dilp1</i> <sup>1</sup>   | $w^{1118}$         | 78055                    | 3L (67C8)                            |
| <i>dilp2</i> mutant   | $w^*$ ; <i>dilp2</i> <sup>1</sup>   | $w^{1118}$         | 30881                    | 3L (67C8)                            |
| <i>dilp3</i> mutant   | $w^*$ ; <i>dilp3</i> <sup>1</sup>   | $w^{1118}$         | 30882                    | 3L (67C8)                            |
| <i>dilp4</i> mutant   | $w^*$ ; <i>dilp4</i> <sup>1</sup>   | $w^{1118}$         | 30883                    | 3L (67C8)                            |
| <i>dilp5</i> mutant   | $w^*$ ; <i>dilp5</i> <sup>1</sup>   | $w^{1118}$         | 30885                    | 3L (67C9)                            |
| <i>dilp7</i> mutant   | $w^*$ ; <i>dilp7</i> <sup>1</sup>   | $w^{1118}$         | 30887                    | X (3E2)                              |
| <i>dilp2-3</i> mutant | $w^*$ ; <i>dilp2-3</i> <sup>1</sup> | $w^{1118}$         | 30889                    | 3L (67C8)                            |

**Datasheet S2. Summary for two-way analysis of variance performed on data of food consumption by the wild type and *dilp* mutants (Figure 1 and Figure 2). Asterisk denotes statistical significance of the estimate.**

**Datasheet S3. Significance of differences (*p*-values) between consumption of food by the wild type and *dilp* mutants on different diets (Figure 1 and Figure 2). The *post hoc* analysis was performed by Tukey's honest significant difference test with Bonferroni correction. Gray color shows significance of the difference.**

**Datasheet S4. Significance of differences (marked  $p < 0.05$ ) between values for the wild type and mutant lines on particular diets. The *post hoc* analysis was performed by Tukey's honest significant difference test with Bonferroni correction. "1" highlighted by gray color means significant difference between value for individuals of the wild type line  $w^{1118}$  and the mutant for corresponding diet. The data were analysed by one-way ANOVA followed by Tukey's honest significant difference test with Bonferroni correction.**

**Table S5.** Coefficients for genotype-diet interactions provided by generalized linear models assessing contribution of genotype to volume of sucrose solution ingested or amount of sucrose eaten. Asterisk denotes statistical significance of the interaction.

|                                           | Sucrose volume |      |          |                 | Sucrose amount |      |          |                 |
|-------------------------------------------|----------------|------|----------|-----------------|----------------|------|----------|-----------------|
|                                           | value          | df   | $\chi^2$ | <i>p</i> -value | value          | df   | $\chi^2$ | <i>p</i> -value |
| <i>w</i> <sup>1118</sup> - <i>dilp1</i>   | 0.286          | 1.00 | 1.09     | 1.000           | 21.622         | 1.00 | 7.29     | 0.083           |
| <i>w</i> <sup>1118</sup> - <i>dilp2</i>   | 0.005          | 1.00 | 0.00     | 1.000           | -12.640        | 1.00 | 2.76     | 0.775           |
| <i>w</i> <sup>1118</sup> - <i>dilp2,3</i> | -0.239         | 1.00 | 0.88     | 1.000           | -34.652        | 1.00 | 21.64    | 0.000 *         |
| <i>w</i> <sup>1118</sup> - <i>dilp3</i>   | -0.378         | 1.00 | 2.11     | 1.000           | -4.101         | 1.00 | 0.29     | 1.000           |
| <i>w</i> <sup>1118</sup> - <i>dilp4</i>   | 0.194          | 1.00 | 0.41     | 1.000           | -27.167        | 1.00 | 9.39     | 0.033 *         |
| <i>w</i> <sup>1118</sup> - <i>dilp5</i>   | 0.090          | 1.00 | 0.12     | 1.000           | -25.253        | 1.00 | 11.44    | 0.012 *         |
| <i>w</i> <sup>1118</sup> - <i>dilp7</i>   | 0.752          | 1.00 | 7.54     | 0.157           | -60.351        | 1.00 | 56.77    | 0.000 *         |
| <i>dilp1-dilp2</i>                        | -0.281         | 1.00 | 0.84     | 1.000           | -34.262        | 1.00 | 14.58    | 0.003 *         |
| <i>dilp1-dilp2,3</i>                      | -0.525         | 1.00 | 3.02     | 1.000           | -56.274        | 1.00 | 40.58    | 0.000 *         |
| <i>dilp1-dilp3</i>                        | -0.092         | 1.00 | 0.09     | 1.000           | -25.723        | 1.00 | 8.22     | 0.054           |
| <i>dilp1-dilp4</i>                        | 0.480          | 1.00 | 1.95     | 1.000           | -48.789        | 1.00 | 23.53    | 0.000 *         |
| <i>dilp1-dilp5</i>                        | 0.376          | 1.00 | 1.54     | 1.000           | -46.875        | 1.00 | 28.07    | 0.000 *         |
| <i>dilp1-dilp7</i>                        | 1.037          | 1.00 | 10.62    | 0.030 *         | -81.973        | 1.00 | 77.50    | 0.000 *         |
| <i>dilp2-dilp2,3</i>                      | -0.244         | 1.00 | 0.71     | 1.000           | -22.013        | 1.00 | 6.75     | 0.103           |
| <i>dilp2-dilp3</i>                        | -0.373         | 1.00 | 1.60     | 1.000           | 8.538          | 1.00 | 0.98     | 1.000           |
| <i>dilp2-dilp4</i>                        | 0.199          | 1.00 | 0.36     | 1.000           | -14.527        | 1.00 | 2.22     | 0.952           |
| <i>dilp2-dilp5</i>                        | 0.095          | 1.00 | 0.11     | 1.000           | -12.613        | 1.00 | 2.21     | 0.952           |
| <i>dilp2-dilp7</i>                        | 0.757          | 1.00 | 6.08     | 0.342           | -47.711        | 1.00 | 28.28    | 0.000 *         |
| <i>dilp2,3-dilp3</i>                      | -0.617         | 1.00 | 4.53     | 0.764           | 30.551         | 1.00 | 12.99    | 0.006 *         |
| <i>dilp2,3-dilp4</i>                      | -0.045         | 1.00 | 0.02     | 1.000           | 7.486          | 1.00 | 0.61     | 1.000           |
| <i>dilp2,3-dilp5</i>                      | -0.149         | 1.00 | 0.27     | 1.000           | 9.400          | 1.00 | 1.27     | 1.000           |
| <i>dilp2,3-dilp7</i>                      | 0.513          | 1.00 | 2.88     | 1.000           | -25.699        | 1.00 | 8.46     | 0.051           |
| <i>dilp3-dilp4</i>                        | -0.572         | 1.00 | 2.95     | 1.000           | -23.066        | 1.00 | 5.60     | 0.161           |
| <i>dilp3-dilp5</i>                        | -0.468         | 1.00 | 2.60     | 1.000           | -21.151        | 1.00 | 6.21     | 0.127           |
| <i>dilp3-dilp7</i>                        | -1.130         | 1.00 | 13.56    | 0.006 *         | -56.250        | 1.00 | 39.30    | 0.000 *         |
| <i>dilp4-dilp5</i>                        | 0.104          | 1.00 | 0.10     | 1.000           | 1.914          | 1.00 | 0.04     | 1.000           |
| <i>dilp4-dilp7</i>                        | -0.558         | 1.00 | 2.63     | 1.000           | -33.184        | 1.00 | 10.89    | 0.015 *         |
| <i>dilp5-dilp7</i>                        | -0.662         | 1.00 | 4.78     | 0.689           | -35.098        | 1.00 | 15.74    | 0.001 *         |

**Table S6.** Coefficients for genotype-diet interactions provided by generalized linear models assessing contribution of genotype to volume of yeast autolysate solution ingested or amount of yeast autolysate eaten. Asterisk denotes statistical significance of the interaction.

|                                           | Yeast autolysate volume |      |          |                 | Yeast autolysate amount |      |          |                 |
|-------------------------------------------|-------------------------|------|----------|-----------------|-------------------------|------|----------|-----------------|
|                                           | value                   | df   | $\chi^2$ | <i>p</i> -value | value                   | df   | $\chi^2$ | <i>p</i> -value |
| <i>w</i> <sup>1118</sup> - <i>dilp1</i>   | -0.091                  | 1.00 | 0.31     | 1.000           | -1.219                  | 1.00 | 0.04     | 1.000           |
| <i>w</i> <sup>1118</sup> - <i>dilp2</i>   | -0.121                  | 1.00 | 0.60     | 1.000           | -10.526                 | 1.00 | 3.60     | 0.404           |
| <i>w</i> <sup>1118</sup> - <i>dilp2,3</i> | -1.590                  | 1.00 | 107.89   | 0.000 *         | -50.307                 | 1.00 | 85.96    | 0.000 *         |
| <i>w</i> <sup>1118</sup> - <i>dilp3</i>   | -0.776                  | 1.00 | 24.57    | 0.000 *         | -32.376                 | 1.00 | 34.08    | 0.000 *         |
| <i>w</i> <sup>1118</sup> - <i>dilp4</i>   | -0.914                  | 1.00 | 25.18    | 0.000 *         | -25.669                 | 1.00 | 15.80    | 0.001 *         |
| <i>w</i> <sup>1118</sup> - <i>dilp5</i>   | -1.137                  | 1.00 | 54.89    | 0.000 *         | -35.446                 | 1.00 | 42.48    | 0.000 *         |
| <i>w</i> <sup>1118</sup> - <i>dilp7</i>   | -1.959                  | 1.00 | 141.61   | 0.000 *         | -55.870                 | 1.00 | 91.70    | 0.000 *         |
| <i>dilp1-dilp2</i>                        | -0.030                  | 1.00 | 0.03     | 1.000           | -9.307                  | 1.00 | 2.03     | 0.927           |
| <i>dilp1-dilp2,3</i>                      | -1.499                  | 1.00 | 68.18    | 0.000 *         | -49.088                 | 1.00 | 58.20    | 0.000 *         |
| <i>dilp1-dilp3</i>                        | -0.684                  | 1.00 | 13.78    | 0.002 *         | -31.158                 | 1.00 | 22.73    | 0.000 *         |
| <i>dilp1-dilp4</i>                        | -0.823                  | 1.00 | 15.87    | 0.001           | -24.450                 | 1.00 | 11.14    | 0.010 *         |
| <i>dilp1-dilp5</i>                        | -1.046                  | 1.00 | 33.07    | 0.000 *         | -34.227                 | 1.00 | 28.20    | 0.000 *         |
| <i>dilp1-dilp7</i>                        | -1.868                  | 1.00 | 95.27    | 0.000 *         | -54.651                 | 1.00 | 64.93    | 0.000 *         |
| <i>dilp2-dilp2,3</i>                      | -1.469                  | 1.00 | 71.16    | 0.000 *         | -39.781                 | 1.00 | 41.52    | 0.000 *         |
| <i>dilp2-dilp3</i>                        | -0.655                  | 1.00 | 13.66    | 0.002 *         | -21.850                 | 1.00 | 12.11    | 0.007 *         |
| <i>dilp2-dilp4</i>                        | -0.794                  | 1.00 | 15.71    | 0.001 *         | -15.143                 | 1.00 | 4.55     | 0.263           |
| <i>dilp2-dilp5</i>                        | -1.016                  | 1.00 | 33.90    | 0.000 *         | -24.919                 | 1.00 | 16.23    | 0.001 *         |
| <i>dilp2-dilp7</i>                        | -1.838                  | 1.00 | 99.37    | 0.000 *         | -45.344                 | 1.00 | 48.13    | 0.000 *         |
| <i>dilp2,3-dilp3</i>                      | 0.814                   | 1.00 | 21.86    | 0.000 *         | 17.930                  | 1.00 | 8.43     | 0.037 *         |
| <i>dilp2,3-dilp4</i>                      | 0.676                   | 1.00 | 11.69    | 0.006 *         | 24.638                  | 1.00 | 12.37    | 0.006 *         |
| <i>dilp2,3-dilp5</i>                      | 0.453                   | 1.00 | 6.99     | 0.066           | 14.861                  | 1.00 | 5.98     | 0.130           |
| <i>dilp2,3-dilp7</i>                      | -0.369                  | 1.00 | 4.13     | 0.269           | -5.563                  | 1.00 | 0.75     | 1.000           |
| <i>dilp3-dilp4</i>                        | -0.139                  | 1.00 | 0.48     | 1.000           | 6.707                   | 1.00 | 0.89     | 1.000           |
| <i>dilp3-dilp5</i>                        | -0.361                  | 1.00 | 4.28     | 0.269           | -3.069                  | 1.00 | 0.25     | 1.000           |
| <i>dilp3-dilp7</i>                        | -1.183                  | 1.00 | 41.18    | 0.000 *         | -23.493                 | 1.00 | 12.92    | 0.005 *         |
| <i>dilp4-dilp5</i>                        | -0.222                  | 1.00 | 1.26     | 1.000           | -9.777                  | 1.00 | 1.94     | 0.927           |
| <i>dilp4-dilp7</i>                        | -1.044                  | 1.00 | 25.54    | 0.000 *         | -30.201                 | 1.00 | 16.99    | 0.001 *         |
| <i>dilp5-dilp7</i>                        | -0.822                  | 1.00 | 20.44    | 0.000 *         | -20.424                 | 1.00 | 10.04    | 0.017 *         |

**Table S7.** Coefficients of the generalized additive models describing the response of circulating glucose in fruit fly lines investigated in this study to concentrations of sucrose and yeast in food. Here and in the tables below: edf – estimated degrees of freedom; ref. df – degrees of freedom for reference distribution.

\*Significance of smooth terms fit by F-test ( $p < 0.05$ ).

|                | $w^{1118}$ | <i>dilp2</i> | <i>dilp3</i> | <i>dilp5</i> | <i>dilp7</i> |
|----------------|------------|--------------|--------------|--------------|--------------|
| <i>edf</i>     |            |              |              |              |              |
| S              | 0.7843     | 1.3690       | 0.0001       | 0.7418       | 0.0001       |
| Y              | 0.0001     | 0.5779       | 1.5576       | 0.6503       | 1.3210       |
| S × Y          | 0.7292     | 0.0000       | 0.4737       | 0.0001       | 1.4120       |
| <i>ref. df</i> |            |              |              |              |              |
| S              | 2.0        | 2.0          | 2.0          | 2.0          | 2.0          |
| Y              | 2.0        | 2.0          | 2.0          | 2.0          | 2.0          |
| S × Y          | 3.0        | 3.0          | 3.0          | 3.0          | 3.0          |
| <i>F</i>       |            |              |              |              |              |
| S              | 1.817      | 1.969        | 0.000        | 1.436        | 0.000        |
| Y              | 0.000      | 0.685        | 6.006        | 0.930        | 2.830        |
| S × Y          | 0.507      | 0.000        | 0.214        | 0.000        | 1.331        |
| <i>p-value</i> |            |              |              |              |              |
| S              | 0.0261     | 0.0711       | 0.4778       | 0.0572       | 0.7685       |
| Y              | 0.6007*    | 0.1324       | 0.0011*      | 0.1000       | 0.0117*      |
| S × Y          | 0.1299     | 0.5411       | 0.2474       | 0.5014       | 0.0528       |

**Table S8.** Coefficients of the generalized additive models describing the response of circulating trehalose in fruit fly lines investigated in this study to concentrations of sucrose and yeast in food. Other information as in Table S7.

|                | $w^{1118}$ | <i>dilp2</i> | <i>dilp3</i> | <i>dilp5</i> | <i>dilp7</i> |
|----------------|------------|--------------|--------------|--------------|--------------|
| <i>edf</i>     |            |              |              |              |              |
| S              | 0.0001     | 0.8971       | 0.9713       | 1.4534       | 0.1176       |
| Y              | 0.9170     | 0.0000       | 0.9288       | 0.5652       | 0.9494       |
| S × Y          | 1.3658     | 1.3630       | 0.0000       | 0.1751       | 1.3707       |
| <i>ref. df</i> |            |              |              |              |              |
| S              | 2.0        | 2.0          | 2.0          | 2.0          | 2.0          |
| Y              | 2.0        | 2.0          | 2.0          | 2.0          | 2.0          |
| S × Y          | 3.0        | 3.0          | 3.0          | 3.0          | 3.0          |
| <i>F</i>       |            |              |              |              |              |
| S              | 0.000      | 4.359        | 6.524        | 2.398        | 0.067        |
| Y              | 5.523      | 0.000        | 16.894       | 0.650        | 9.383        |
| S × Y          | 2.162      | 2.829        | 0.000        | 0.068        | 1.761        |
| <i>p-value</i> |            |              |              |              |              |
| S              | 0.5574     | 0.0017*      | 0.0000*      | 0.0486*      | 0.2903       |
| Y              | 0.0010*    | 0.9517       | 0.0007*      | 0.1373       | 0.0001*      |
| S × Y          | 0.0134*    | 0.0054*      | 0.8788       | 0.2803       | 0.0316*      |

**Table S9.** Coefficients of the generalized additive models describing the response of glycogen content in fruit fly lines investigated in this study to concentrations of sucrose and yeast in food. Other information as in Table S7.

|                | $w^{1118}$ | <i>dilp2</i> | <i>dilp3</i> | <i>dilp5</i> | <i>dilp7</i> |
|----------------|------------|--------------|--------------|--------------|--------------|
| <b>edf</b>     |            |              |              |              |              |
| S              | 1.5600     | 0.0000       | 1.6260       | 0.0001       | 0.9041       |
| Y              | 0.0000     | 0.0000       | 0.5468       | 1.3000       | 0.0001       |
| S × Y          | 0.0000     | 0.0000       | 0.0000       | 1.2170       | 1.6031       |
| <b>Ref. df</b> |            |              |              |              |              |
| S              | 2.0        | 2.0          | 2.0          | 2.0          | 2.0          |
| Y              | 2.0        | 2.0          | 2.0          | 2.0          | 2.0          |
| S × Y          | 3.0        | 3.0          | 3.0          | 3.0          | 3.0          |
| <b>F</b>       |            |              |              |              |              |
| S              | 5.629      | 0.000        | 12.159       | 0.000        | 4.714        |
| Y              | 0.000      | 0.000        | 0.603        | 2.593        | 0.000        |
| S × Y          | 0.000      | 0.000        | 0.000        | 1.538        | 3.423        |
| <b>p-value</b> |            |              |              |              |              |
| S              | 0.0018*    | 1.0000       | 0.0000*      | 0.5807       | 0.0000*      |
| Y              | 0.9731     | 1.0000       | 0.1470       | 0.0270*      | 0.4413       |
| S × Y          | 0.9995     | 1.0000       | 0.4620       | 0.0308*      | 0.0036*      |

**Table S10.** Coefficients of the generalized additive models describing the response of triacylglyceride content in fruit fly lines investigated in this study to concentrations of sucrose and yeast in food. Other information as in Table S7.

|                | $w^{1118}$ | <i>dilp2</i> | <i>dilp3</i> | <i>dilp5</i> | <i>dilp7</i> |
|----------------|------------|--------------|--------------|--------------|--------------|
| <b>edf</b>     |            |              |              |              |              |
| S              | 0.9335     | 0.9445       | 0.0000       | 0.0000       | 0.8101       |
| Y              | 0.0000     | 0.8561       | 0.4947       | 0.5962       | 0.8291       |
| S × Y          | 0.2901     | 0.0001       | 0.0000       | 0.0003       | 2.1608       |
| <b>Ref. df</b> |            |              |              |              |              |
| S              | 2.0        | 2.0          | 2.0          | 2.0          | 2.0          |
| Y              | 2.0        | 2.0          | 2.0          | 2.0          | 2.0          |
| S × Y          | 3.0        | 3.0          | 3.0          | 3.0          | 3.0          |
| <b>F</b>       |            |              |              |              |              |
| S              | 7.016      | 8.507        | 0.000        | 0.000        | 2.133        |
| Y              | 0.000      | 2.973        | 0.489        | 0.738        | 2.424        |
| S × Y          | 0.122      | 0.000        | 0.000        | 0.000        | 2.811        |
| <b>p-value</b> |            |              |              |              |              |
| S              | 0.0003*    | 0.0001*      | 0.8060       | 1.0000       | 0.0260*      |
| Y              | 0.9351     | 0.0123*      | 0.1680       | 0.1250       | 0.0194*      |
| S × Y          | 0.2753     | 0.5186       | 0.8980       | 0.3560       | 0.0168*      |

**Table S11.** Coefficients of the generalized additive models describing the response of whole body glucose content in fruit fly lines investigated in this study to concentrations of sucrose and yeast in food. Other information as in Table S7.

|                | $w^{1118}$ | <i>dilp2</i> | <i>dilp3</i> | <i>dilp5</i> | <i>dilp7</i> |
|----------------|------------|--------------|--------------|--------------|--------------|
| <b>edf</b>     |            |              |              |              |              |
| S              | 1.5269     | 0.1836       | 0.7189       | 0.3512       | 1.6990       |
| Y              | 0.0003     | 0.0000       | 1.4840       | 0.0001       | 1.7200       |
| S × Y          | 0.3992     | 0.0000       | 0.0000       | 0.0000       | 0.0001       |
| <b>Ref. df</b> |            |              |              |              |              |
| S              | 2.0        | 2.0          | 2.0          | 2.0          | 2.0          |
| Y              | 2.0        | 2.0          | 2.0          | 2.0          | 2.0          |
| S × Y          | 3.0        | 3.0          | 3.0          | 3.0          | 3.0          |
| <b>F</b>       |            |              |              |              |              |
| S              | 2.521      | 0.112        | 1.278        | 0.271        | 5.060        |
| Y              | 0.000      | 0.000        | 3.451        | 0.000        | 4.566        |
| S × Y          | 0.189      | 0.000        | 0.000        | 0.000        | 0.000        |
| <b>p-value</b> |            |              |              |              |              |
| S              | 0.0411*    | 0.2760       | 0.0680       | 0.2230       | 0.0064*      |
| Y              | 0.4442     | 0.6950       | 0.0179*      | 0.3970       | 0.0102*      |
| S × Y          | 0.2262     | 0.8050       | 0.5661       | 0.8610       | 0.6891       |

**Table S12.** Coefficients of the generalized additive models describing the response of whole body trehalose content in fruit fly lines investigated in this study to concentrations of sucrose and yeast in food. Other information as in Table S7.

|                | $w^{1118}$ | <i>dilp2</i> | <i>dilp3</i> | <i>dilp5</i> | <i>dilp7</i> |
|----------------|------------|--------------|--------------|--------------|--------------|
| <b>edf</b>     |            |              |              |              |              |
| S              | 0.0000     | 0.0000       | 0.0000       | 0.5899       | 0.0011       |
| Y              | 0.0000     | 0.0000       | 0.0001       | 0.0006       | 0.0002       |
| S × Y          | 0.7184     | 0.0001       | 0.0000       | 0.0000       | 0.0001       |
| <b>Ref. df</b> |            |              |              |              |              |
| S              | 2.0        | 2.0          | 2.0          | 2.0          | 2.0          |
| Y              | 2.0        | 2.0          | 2.0          | 2.0          | 2.0          |
| S × Y          | 3.0        | 3.0          | 3.0          | 3.0          | 3.0          |
| <b>F</b>       |            |              |              |              |              |
| S              | 0.000      | 0.000        | 0.000        | 0.719        | 0.001        |
| Y              | 0.000      | 0.000        | 0.000        | 0.000        | 0.000        |
| S × Y          | 0.458      | 0.000        | 0.000        | 0.000        | 0.000        |
| <b>p-value</b> |            |              |              |              |              |
| S              | 0.7580     | 0.8090       | 0.9200       | 0.1280       | 0.3300       |
| Y              | 0.6210     | 0.9720       | 0.3940       | 0.3340       | 0.4080       |
| S × Y          | 0.1580     | 0.4300       | 0.4300       | 0.6320       | 0.7920       |



**Table S13.** Coefficients of the generalized additive models describing the response of weight of fruit fly lines investigated in this study to concentrations of sucrose and yeast in food. Other information as in Table S7.

|                | $w^{1118}$ | <i>dilp2</i> | <i>dilp3</i> | <i>dilp5</i> | <i>dilp7</i> |
|----------------|------------|--------------|--------------|--------------|--------------|
| <b>edf</b>     |            |              |              |              |              |
| S              | 0.8210     | 0.8143       | 0.0000       | 0.0000       | 0.0000       |
| Y              | 0.7545     | 0.0000       | 0.5382       | 0.0000       | 0.0000       |
| S × Y          | 0.0000     | 0.0000       | 0.0000       | 0.0000       | 0.6730       |
| <b>Ref. df</b> |            |              |              |              |              |
| S              | 2.0        | 2.0          | 2.0          | 2.0          | 2.0          |
| Y              | 2.0        | 2.0          | 2.0          | 2.0          | 2.0          |
| S × Y          | 3.0        | 3.0          | 3.0          | 3.0          | 3.0          |
| <b>F</b>       |            |              |              |              |              |
| S              | 2.294      | 1.414        | 0.583        | 0.000        | 0.000        |
| Y              | 1.536      | 0.000        | 0.000        | 0.000        | 0.000        |
| S × Y          | 0.000      | 0.000        | 0.000        | 0.000        | 0.381        |
| <b>p-value</b> |            |              |              |              |              |
| S              | 0.0218*    | 0.0610       | 0.1500       | 0.7940       | 0.4670       |
| Y              | 0.0487*    | 0.9750       | 0.9490       | 0.5910       | 0.8710       |
| S × Y          | 0.9404     | 0.6710       | 0.6790       | 1.0000       | 0.1940       |
